# Supplementary material for: Cross-tissue transcriptome-wide association studies identify susceptibility genes shared between schizophrenia and inflammatory bowel disease
Source: PubMed Central journal article supplement (PMC8776955; doi:10.1038/s42003-022-03031-6), 2022-01-20
Supplement: 42003_2022_3031_MOESM3_ESM.pdf [file 42003_2022_3031_MOESM3_ESM.pdf]

## Description of Additional Supplementary Files

**File name:** Supplementary Data 1

**Description:** GWAS case/control panels (summary statistics) used for TWAS analysis

**File name:** Supplementary Data 2

**Description:** Number of samples per tissue and successfully tested genes from UTMOST cross-tissue expression imputation models

**File name:** Supplementary Data 3

**Description:** Marginal (i.e. unconditioned) and conditioned UTMOST TWAS association results

**File name:** Supplementary Data 4

**Description:** Moderate correlation was observed between sample size and number of significant genes

**File name:** Supplementary Data 5

**Description:** Genomic inflation factor values for transcriptome-wide association analysis of the generalized Berk-Jones test across 23 tissues of the gut-brain-axis

**File name:** Supplementary Data 6

**Description:** Number of gene discoveries from cross-tissue multiple-gene-conditioned transcriptome-wide association analysis across 23 tissues of the gut-brain-axis.

**File name:** Supplementary Data 7

**Description:** Position of known GWAS lead SNPs and 0.1 cM locus boundaries of the seven traits studied.

**File name:** Supplementary Data 8

**Description:** Comorbidity analysis in the Danish National Patient Registry (DNPR) and ICD10 diagnose codes from 7,191,385 people of the entire Danish population in the period from 1996 to 2018

**File name:** Supplementary Data 9

**Description:** Genetic trait correlation and trait heritability calculated with LDSC for SCZ, BD, ADHD, MDD, UC, CD and PSC

**File name:** Supplementary Data 10

**Description:** Pair-wise trait correlations at the level of predicted gene expression (and LDSC regression) for all pairs of diseases and 23 tissues

**File name:** Supplementary Data 11

**Description:** Results from bi-directional GSMR (Generalised Summary-data-based Mendelian Randomisation) analysis

**File name:** Supplementary Data 12

**Description:** Gene-disease associations shared between psychiatric and inflammatory diseases identified by gene overlap analysis

**File name:** Supplementary Data 13

**Description:** Four susceptibility genes with GBJ-test transcriptome-wide significance are shared by

psychiatric and immune diseases of the gut-brain-axis (GBA), but each in different tissues for psychiatric and immune phenotypes

**File name:** Supplementary Data 14

**Description:** The three single-tissue conditional TWAS susceptibility genes NR5A2, SATB2 and PPP3CA are shared between SCZ and CD/UC

**File name:** Supplementary Data 15

**Description:** EnrichR identifies "Calcineurin-dependent NFAT signaling role in lymphocytes" in BioPlanet 2019 which is intertwined with Wnt-signaling as probable common term

**File name:** Supplementary Data 16

**Description:** Data displayed in Figure 3

**File name:** Supplementary Data 17

**Description:** Data displayed in Figure 4

**File name:** Supplementary Data 18

**Description:** Data displayed in Figure 5
